# Supplementary material for: Escherichia coli and Staphylococcus aureus Differentially Regulate Nrf2 Pathway in Bovine Mammary Epithelial Cells: Relation to Distinct Innate Immune Response
Source: MDPI journal article supplement (doi:10.3390/cells10123426), 2021-12-06
Supplement: s1 [file s1]

**Table S2. Dysregulated genes in response to *S. aureus* stimulation compared to unstimulated control cells**

| Gene symbol     | Gene name                                                                     | log2FC | FDR     | Regulated | Function                                                                            |
|-----------------|-------------------------------------------------------------------------------|--------|---------|-----------|-------------------------------------------------------------------------------------|
| <b>HLA-DRB3</b> | major histocompatibility complex, class II, DR beta 3 precursor               | 0.62   | 3.38E-2 | up        | peptide binding and MHC class II receptor activity                                  |
| <b>Grem1</b>    | gremlin-1 isoform X1                                                          | 0.65   | 1.92E-4 | up        | cytokine activity and BMP binding                                                   |
| <b>FGFBP1</b>   | fibroblast growth factor-binding protein 1 precursor                          | 0.46   | 4.14E-3 | up        | heparin binding and fibroblast growth factor binding                                |
| <b>DDIT4</b>    | DNA damage-inducible transcript 4 protein                                     | 0.38   | 4.26E-2 | up        | responses to hypoxia and DNA damage                                                 |
| <b>MYOZ3</b>    | myozenin-3 isoform                                                            | -1.21  | 2.17E-2 | down      | calcineurin-interacting proteins                                                    |
| <b>DAPP1</b>    | dual adapter for phosphotyrosine and 3-phosphotyrosine and 3-phosphoinositide | -1.18  | 2.17E-2 | down      | phospholipid binding and phosphatidylinositol-3,4-bisphosphate binding              |
| <b>EGR1</b>     | early growth response protein 1                                               | -0.83  | 2.87E-4 | down      | transcriptional regulator                                                           |
| <b>NF2L3</b>    | nuclear factor erythroid 2-related factor 3                                   | -0.80  | 1.13E-2 | down      | DNA-binding transcription factor activity and transcription coactivator activity    |
| <b>Ckb</b>      | creatine kinase B-type                                                        | -0.76  | 4.14E-6 | down      | transferase activity, transferring phosphorus-containing groups and kinase activity |
| <b>C-fos</b>    | proto-oncogene c-Fos                                                          | -0.76  | 3.54E-6 | down      | regulators of cell proliferation, differentiation, and transformation               |
| <b>GADD45B</b>  | growth arrest and DNA damage-inducible protein GADD45 beta                    | -0.52  | 2.21E-3 | down      | regulation of growth and apoptosis                                                  |
