# Supplementary material for: Escherichia coli and Staphylococcus aureus Differentially Regulate Nrf2 Pathway in Bovine Mammary Epithelial Cells: Relation to Distinct Innate Immune Response
Source: MDPI journal article supplement (doi:10.3390/cells10123426), 2021-12-06
Supplement: s1 [file s1]

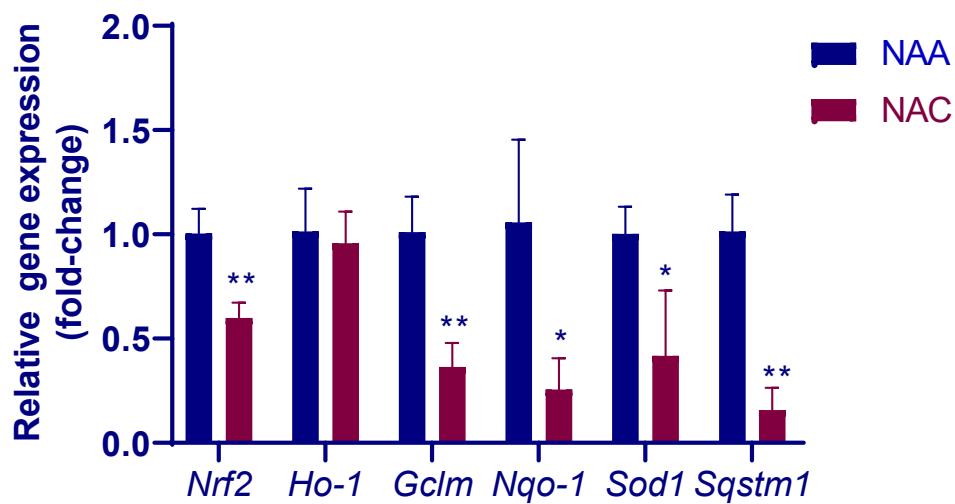

**Fig. S3. Nrf2 activation by LPS is ROS-dependent.** Cells were pretreated with NAA or NAC at 20 mM for 1 h and then incubated with LPS (10 µg/mL) for further 6 h. Total RNAs were prepared and subjected to qPCR for determining the mRNA levels of *Nrf2*, *Ho-1*, *Gclm*, *Nqo-1*, *Sod1* and *Sqstm1*. The results are the mean ± s.d. of three replicates and are representative of 3 separate experiments. \* $P < 0.05$  and \*\*  $P < 0.01$  compared to NAA.
