# Supplementary material for: Escherichia coli and Staphylococcus aureus Differentially Regulate Nrf2 Pathway in Bovine Mammary Epithelial Cells: Relation to Distinct Innate Immune Response
Source: MDPI journal article supplement (doi:10.3390/cells10123426), 2021-12-06
Supplement: s1 [file s1]

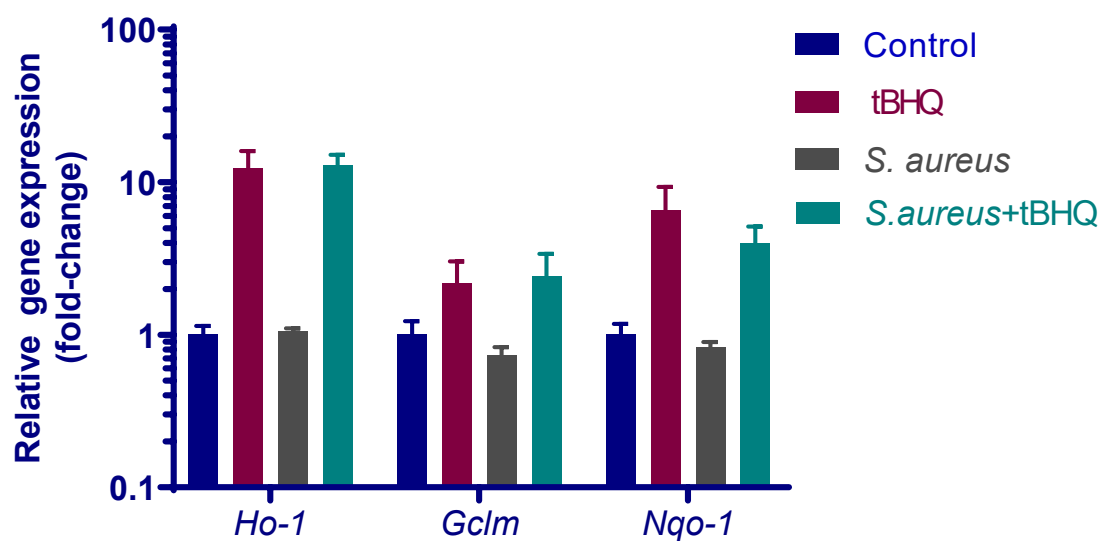

**Fig. S4. The effect of *S.aureus* on tBHQ-induced Nrf2 activation.** Cells were pretreated with *tert*-butylhydroquinone (tBHQ) at 50  $\mu$ M for 1 h followed by incubation with *S. aureus* ( $1 \times 10^7$  particles/mL) for further 6 h. Total RNAs were prepared and subjected to qPCR analyses for determining mRNA levels of *Ho-1*, *Gclm* and *Nqo-1*. The results are the mean  $\pm$  s.d. of three replicates.
