# Supplementary material for: Escherichia coli and Staphylococcus aureus Differentially Regulate Nrf2 Pathway in Bovine Mammary Epithelial Cells: Relation to Distinct Innate Immune Response
Source: MDPI journal article supplement (doi:10.3390/cells10123426), 2021-12-06
Supplement: s1 [file s1]

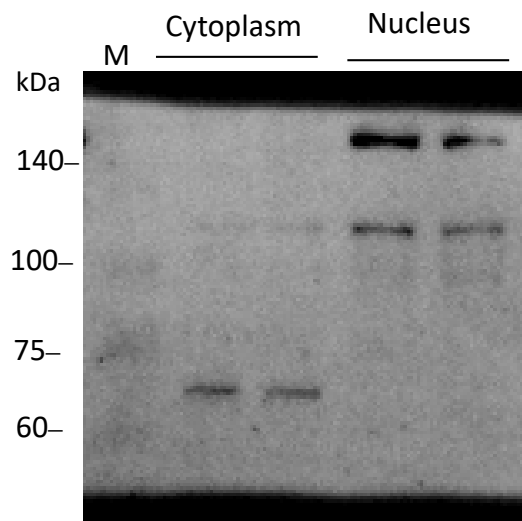

**Fig. S2.** Determination of biologically relevant band of Nrf2 on SDS-PAGE gel. Cytoplasmic and nuclear proteins were extracted from normal primary bovine mammary epithelial cells (bMEC) and subjected to Western blot analysis with an anti-Nrf2 antibody. One band with molecular weight of ~65 kDa in the cytoplasmic fractions and one of ~110 kDa in the nuclear fractions were determined. Two different samples were used.
