# Supplementary material for: Escherichia coli and Staphylococcus aureus Differentially Regulate Nrf2 Pathway in Bovine Mammary Epithelial Cells: Relation to Distinct Innate Immune Response
Source: MDPI journal article supplement (doi:10.3390/cells10123426), 2021-12-06
Supplement: s1 [file s1]

**Table S1** Sequences of oligonucleotide primers used for real-time quantitative PCR analysis

| Gene           | Gen Bank Accession | Primer sequences (5'→3')                                | Amplicon<br>(bp) | size | Annealing<br>temperature (°C) | Validation |                |
|----------------|--------------------|---------------------------------------------------------|------------------|------|-------------------------------|------------|----------------|
|                |                    |                                                         |                  |      |                               | Efficiency | R <sup>2</sup> |
| <i>PGK1</i>    | NM_001034299       | F: TGCAGCTGAATTGCCAAGATG<br>R: CAGCCTTGATCCTCTGGTTGT    | 145              |      | 60                            | 92%        | 0.999          |
| <i>RPL19</i>   | XM_002702167       | F: TGATCATCCGGAAGCCTGTG<br>R: ATTGGCAGTACCCTTTCGCT      | 113              |      | 60                            | 98%        | 0.999          |
| <i>CCL5</i>    | NM_175827          | F: CACCCACGTCCAGGAGTATT<br>G: AGCGTTGATGTACTCTCGCA      | 130              |      | 60                            | 94%        | 0.999          |
| <i>Gclm</i>    | NM_001038143       | F: AGTGGGCACAGGTAAAACCA<br>R: TGCAGTCAAATCAGGTGGCA      | 77               |      | 50                            | 109%       | 0.993          |
| <i>GSR</i>     | NM_001114190       | F: GAGATCTCGTACGACTACCTGGTG<br>R: TGGGTACACATCCGACATTCA | 145              |      | 60                            | 130%       | 0.960          |
| <i>IL-6</i>    | NM_173923          | F: ACGAAAGAGAGCTCCATCTGC<br>R: AATGGAGTGAAGGCGCTTGT     | 71               |      | 60                            | 89%        | 0.992          |
| <i>IL-8</i>    | NM_173925          | F: TCCAAGCTGGCTGTTGCTC<br>R: TGGGGTGGAAAGGTGTGGAAT      | 133              |      | 60                            | 91%        | 1.000          |
| <i>IL-18</i>   | NM_853484          | F: GCAAGGAGAGGAAAGAGACAACA<br>R: GGGTGGGCGTATCACCTTT    | 98               |      | 60                            | 95%        | 0.999          |
| <i>IL-20RA</i> | NM_001206342       | F: TGGGCAGAACTGGACGATT<br>R: TCTTTGGAGCCGTCAGAACA       | 112              |      | 60                            | 92%        | 0.991          |
| <i>Nqo-1</i>   | NM_001034535       | F: TGGCCAATTCAGAGTGGCA<br>R: GGGAGTGTGCCCAATGCTAT       | 84               |      | 60                            | 127%       | 0.981          |
| <i>Nrf2</i>    | NM_001011678       | F: GCATGATGGACTTGGAGCTG<br>R: GCTCATGCTCCTTCTGTCGT      | 144              |      | 60                            | 118%       | 0.992          |

|             |           |                                                     |     |    |      |       |
|-------------|-----------|-----------------------------------------------------|-----|----|------|-------|
| <i>Sod1</i> | NM_174615 | F: TTCTCTACTTGGTTGGGGCG<br>R: ACGACTGTATCTCCCTTTGCC | 145 | 60 | 91%  | 0.998 |
| <i>Sod2</i> | NM_201527 | F: GGATCCCCTGCAAGGAACAA<br>R: TGGCCTTCAGATAATCGGGC  | 110 | 60 | 103% | 0.999 |

---
