# Supplementary material for: Escherichia coli and Staphylococcus aureus Differentially Regulate Nrf2 Pathway in Bovine Mammary Epithelial Cells: Relation to Distinct Innate Immune Response
Source: MDPI journal article supplement (doi:10.3390/cells10123426), 2021-12-06
Supplement: s1 [file s1]

**Table S3. Dysregulated Nrf2 downstream target genes in response to *E. coli* and *S. aureus* stimulation compared to unstimulated control cells.**

| General biochemical function                                    | Symbol  | Name                                                                                                    | <i>E. coli</i> |          |           | <i>S. aureus</i> |
|-----------------------------------------------------------------|---------|---------------------------------------------------------------------------------------------------------|----------------|----------|-----------|------------------|
|                                                                 |         |                                                                                                         | log2FC         | FDR      | regulated | regulated        |
| Detoxication: Phase I drug, oxidation, reduction and hydrolysis | ABCC4   | ATP-binding cassette subfamily C member 4, also known as multidrug resistance-associated protein 4      | 0.61           | 3.67E-06 | up        | normal           |
|                                                                 | ALDH1A3 | aldehyde dehydrogenase 1 family, member A3                                                              | 0.74           | 1.02E-03 | up        | normal           |
|                                                                 | ALDH7A1 | aldehyde dehydrogenase 7 family, member A1                                                              | 0.28           | 1.57E-02 | up        | normal           |
|                                                                 | CYP3A4  | cytochrome P450, family 3, subfamily A                                                                  | 1.43           | 5.08E-46 | up        | normal           |
| Drug transporter                                                | EPHX2   | epoxide hydrolase 2                                                                                     | 1.32           | 9.04E-04 | up        | normal           |
|                                                                 | GSR1    | glutathione reductase                                                                                   | 0.46           | 8.97E-04 | up        | normal           |
|                                                                 | GPX8    | glutathione peroxidase 8                                                                                | 0.44           | 1.48E-02 | up        | normal           |
|                                                                 | SLC6A9  | glycine transporter                                                                                     | 3.96           | 7.28E-46 | up        | normal           |
| Antioxidant: GSH-based system                                   | GST     | Glutathione S-transferase                                                                               | 0.61           | 1.94E-02 | up        | normal           |
|                                                                 | SLC1A1  | Solute carrier family 1 (neuronal/epithelial high affinity glutamate transporter, system Xag), member 1 | 0.54           | 6.24E-07 | up        | normal           |
| Antioxidant: TXN-based system                                   | TXNRD1  | thioredoxin reductase 1                                                                                 | 1.85           | 1.70E-29 | up        | normal           |
|                                                                 | Trx     | thioredoxin                                                                                             | 0.33           | 2.72E-03 | up        | normal           |
|                                                                 | TXNIP   | thioredoxin-interacting protein                                                                         | 0.91           | 2.71E-03 | up        | normal           |
| Antioxidant enzyme                                              | SOD2    | superoxide dismutase 2                                                                                  | 1.85           | 1.70E-29 | up        | normal           |
| Carbohydrate metabolism and NADPH regeneration                  | ME1     | malic enzyme 1, NADP+-dependent, cytosolic                                                              | 0.63           | 3.10E-11 | up        | normal           |
| Lipid metabolism: lipases                                       | LIPH    | lipase, member H                                                                                        | 0.44           | 3.76E-05 | up        | normal           |
