# Supplementary material for: Escherichia coli and Staphylococcus aureus Differentially Regulate Nrf2 Pathway in Bovine Mammary Epithelial Cells: Relation to Distinct Innate Immune Response
Source: MDPI journal article supplement (doi:10.3390/cells10123426), 2021-12-06
Supplement: s1 [file s1]

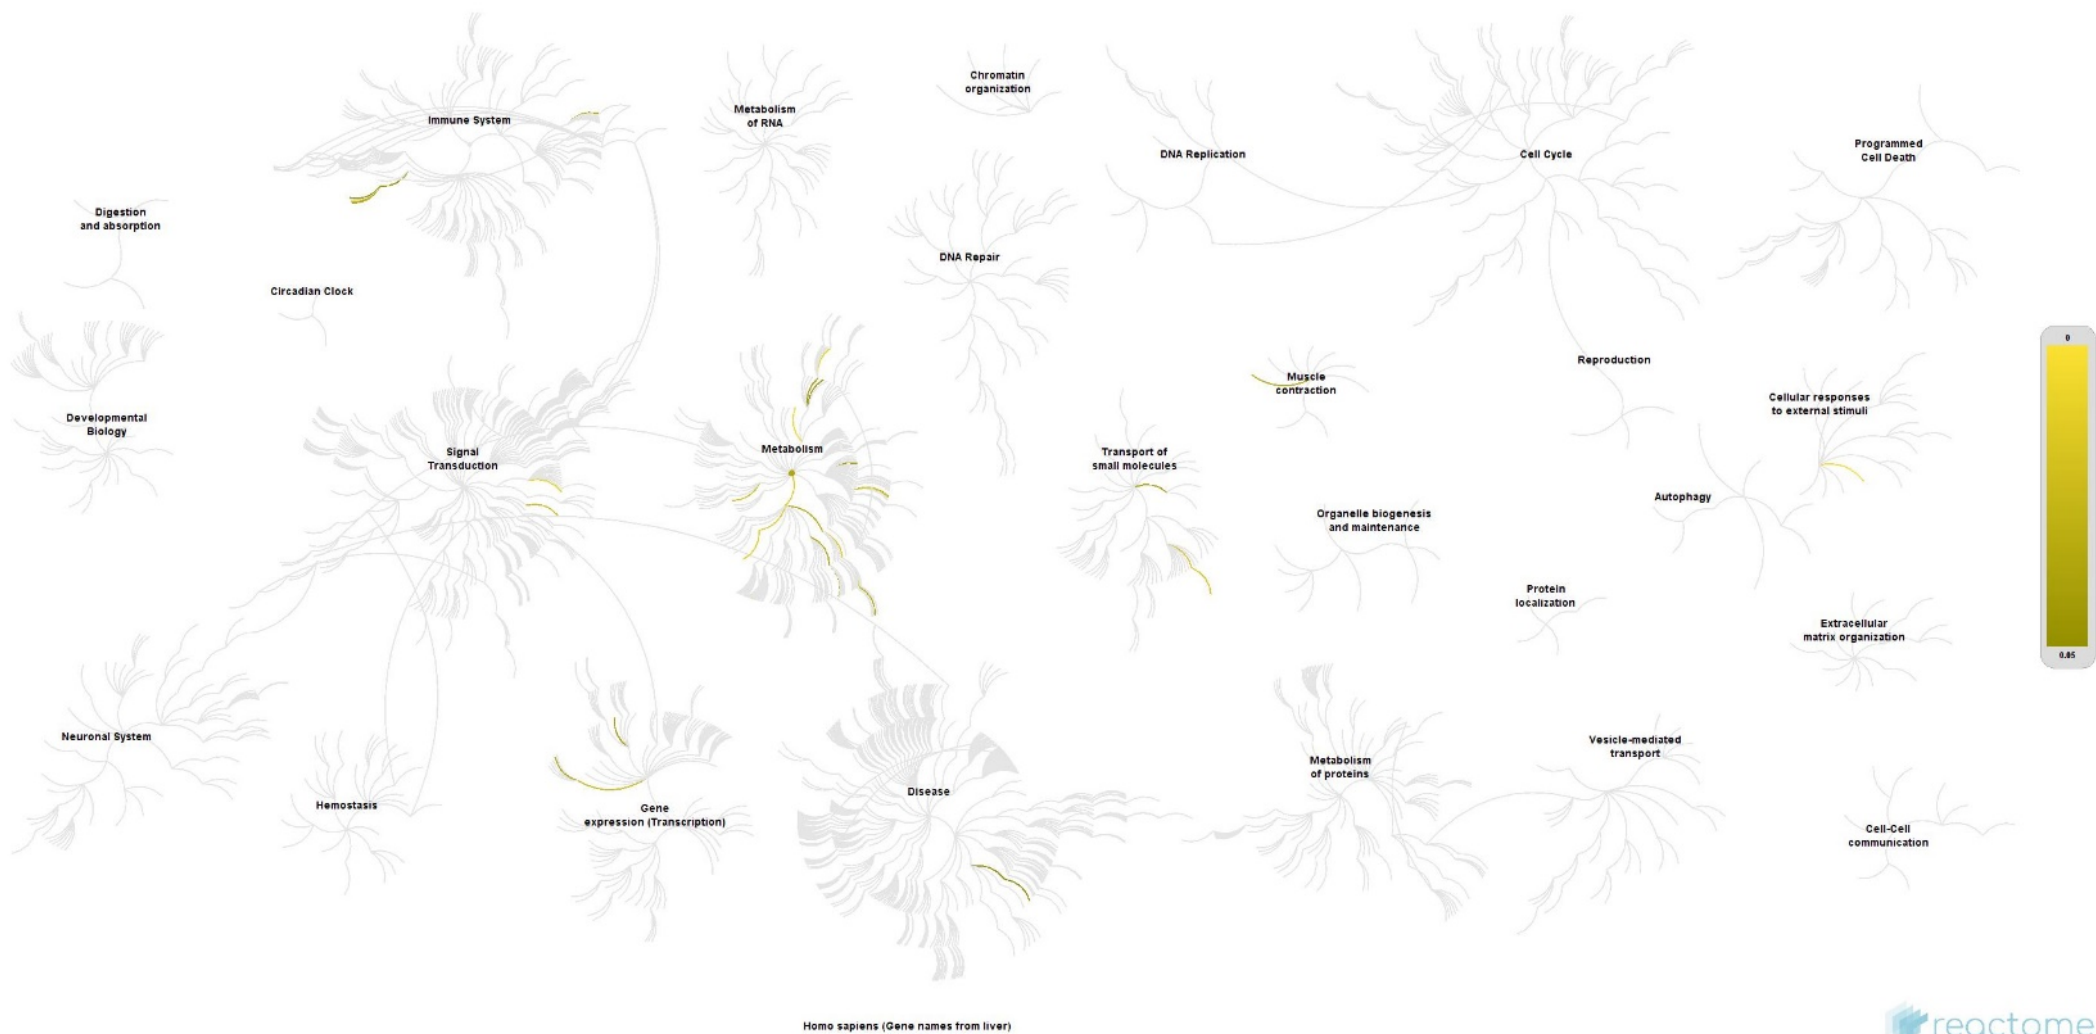

**Fig. S1.** Enrichment map of Reactome pathways enriched in upregulated Nrf2 target genes. Pathways overrepresented are represented in yellow and pathways not significantly overrepresented are represented in gray. Significant enrichment of a pathway was defined as FDR < 0.05.
